# Supplementary material for: Expanding dasatinib beyond KIT in acute myeloid leukemia
Source: PubMed Central journal article supplement — Haematologica. 2020 Dec 1;105(12):2708–10. doi: 10.3324/haematol.2020.262147 (PMC7716351; doi:10.3324/haematol.2020.262147), 2020-12-01
Supplement: 2020_262147-Disclosure.pdf [file 2020_262147-Disclosure.pdf]

Haematologica  
HAEMATOL/2020/262147  
Version 1  
Expanding dasatinib beyond KIT in AML

John S. Welch

Disclosures: None
